# Supplementary material for: Liver Transcriptome Analysis of the Black Porgy (Acanthopagrus schlegelii) under Acute Low-Temperature Stress
Source: MDPI journal article supplement (doi:10.3390/life13030721), 2023-03-07
Supplement: s1 [file s1]

**Supplement Table S1.** Expression of 60 DEGs in profile 5, profile 6 and profile 7 at different temperatures

| ID                | Profile | AS | AL1  | AL2   | Symbol   |
|-------------------|---------|----|------|-------|----------|
| BP_GLEAN_10000233 | 7       | 0  | 2.8  | 4.97  | diablo   |
| BP_GLEAN_10002830 | 7       | 0  | 2.82 | 5.08  | diablo   |
| BP_GLEAN_10003165 | 7       | 0  | 1.79 | 3.27  | Tis11    |
| BP_GLEAN_10005396 | 7       | 0  | 1.21 | 2.41  | myc      |
| BP_GLEAN_10005639 | 7       | 0  | 1.75 | 4.05  | ARL14    |
| BP_GLEAN_10005816 | 7       | 0  | 1.1  | 2.73  | BHLHE40  |
| BP_GLEAN_10006143 | 7       | 0  | 1.12 | 2.36  | Tnfsf10  |
| BP_GLEAN_10007279 | 7       | 0  | 2.78 | 6.34  | CYP27B1  |
| BP_GLEAN_10007289 | 7       | 0  | 1.13 | 2.89  | Nr1d2    |
| BP_GLEAN_10007370 | 7       | 0  | 1.71 | 3.48  | NR1D2    |
| BP_GLEAN_10008929 | 7       | 0  | 1.95 | 3.68  | Vegfa    |
| BP_GLEAN_10011108 | 7       | 0  | 2.11 | 3.55  | GADD45G  |
| BP_GLEAN_10011604 | 7       | 0  | 2.78 | 3.8   | nfil3    |
| BP_GLEAN_10011616 | 7       | 0  | 1.19 | 3.61  | junb     |
| BP_GLEAN_10011841 | 7       | 0  | 2.14 | 3.5   | Irs2     |
| BP_GLEAN_10014551 | 7       | 0  | 2.88 | 4.01  | ddit4    |
| BP_GLEAN_10015535 | 7       | 0  | 1.75 | 2.97  | Trib1    |
| BP_GLEAN_10015671 | 7       | 0  | 2.16 | 3.29  | PRELID3B |
| BP_GLEAN_10015689 | 7       | 0  | 1.1  | 2.64  | SOAT1    |
| BP_GLEAN_10015732 | 7       | 0  | 1.48 | 2.69  | Errfi1   |
| BP_GLEAN_10016005 | 7       | 0  | 1.32 | 3.63  | Bhlhe40  |
| BP_GLEAN_10018435 | 7       | 0  | 2.74 | 4.13  | MSH5     |
| BP_GLEAN_10019203 | 7       | 0  | 2.35 | 3.5   | Cebpd    |
| MSTRG.9053        | 7       | 0  | 2.79 | 4.56  | adrb2    |
| BP_GLEAN_10000555 | 5       | 0  | 3.65 | 1.14  | Sqstm1   |
| BP_GLEAN_10005592 | 5       | 0  | 2.36 | 1.07  | rab4b    |
| BP_GLEAN_10005601 | 5       | 0  | 2.55 | 1.15  | RELB     |
| BP_GLEAN_10006362 | 5       | 0  | 2.78 | 1.25  | Ulk2     |
| BP_GLEAN_10006563 | 5       | 0  | 3.83 | 1.89  | foxo1a   |
| BP_GLEAN_10006783 | 5       | 0  | 2.34 | -1.35 | LTBR     |
| BP_GLEAN_10008121 | 5       | 0  | 2.69 | 1.23  | ZFYVE1   |
| BP_GLEAN_10009421 | 5       | 0  | 3.31 | 1.47  | Tat      |
| BP_GLEAN_10011321 | 5       | 0  | 2.64 | 1.07  | VPS37B   |
| BP_GLEAN_10012150 | 5       | 0  | 4.27 | 1.69  | TNIP2    |
| BP_GLEAN_10016747 | 5       | 0  | 1.36 | -1.17 | EIF4E    |
| BP_GLEAN_10017349 | 5       | 0  | 2.86 | 1.35  | MTERF2   |
| BP_GLEAN_10017986 | 5       | 0  | 2.81 | -1.14 | SLC4A4   |
| BP_GLEAN_10018132 | 5       | 0  | 2.91 | -1.8  | --       |
| BP_GLEAN_10018743 | 5       | 0  | 1.27 | -1.06 | Homez    |
| BP_GLEAN_10018847 | 5       | 0  | 2.69 | 1.31  | PDE4B    |
| BP_GLEAN_10018972 | 5       | 0  | 3.21 | 1.5   | GDF15    |
| MSTRG.13130       | 5       | 0  | 3.28 | 1.34  | --       |
| MSTRG.14166       | 5       | 0  | 3.17 | 1.3   | --       |
| MSTRG.14168       | 5       | 0  | 3.57 | 1.03  | --       |
| MSTRG.14645       | 5       | 0  | 1.98 | -1.1  | --       |
| MSTRG.5848        | 5       | 0  | 3.51 | 1.39  | --       |
| MSTRG.8213        | 5       | 0  | 3.15 | -1.96 | --       |
| MSTRG.8997        | 5       | 0  | 2.7  | 1.33  | --       |
| BP_GLEAN_10008119 | 6       | 0  | 5.24 | 2.91  | chac1    |
| BP_GLEAN_10010872 | 6       | 0  | 4.15 | 2.63  | --       |
| BP_GLEAN_10012428 | 6       | 0  | 4.16 | 2.85  | KLF9     |

|                   |   |   |       |      |        |
|-------------------|---|---|-------|------|--------|
| BP_GLEAN_10012495 | 6 | 0 | 3.5   | 2.34 | Zfand5 |
| BP_GLEAN_10013248 | 6 | 0 | 3.11  | 1.69 | LPL    |
| BP_GLEAN_10013775 | 6 | 0 | 2.89  | 3.92 | CIART  |
| BP_GLEAN_10014277 | 6 | 0 | 3.31  | 2.24 | Pnpla2 |
| MSTRG.14119       | 6 | 0 | 2.99  | 1.74 | --     |
| MSTRG.14167       | 6 | 0 | 10.58 | 8.21 | --     |
| MSTRG.704         | 6 | 0 | 3.57  | 2.19 | LPL    |
| MSTRG.9159        | 6 | 0 | 3.61  | 2.29 | --     |
| MSTRG.9292        | 6 | 0 | 4.05  | 2.94 | --     |

**Supplement Table S2.** GO terms enriched from 60 significantly differentially expressed genes

| Class              | ID         | Term                                               | Gene Number |
|--------------------|------------|----------------------------------------------------|-------------|
| Molecular Function | GO:0003674 | nucleic acid binding transcription factor activity | 4           |
|                    | GO:0003674 | catalytic activity                                 | 8           |
|                    | GO:0003674 | signal transducer activity                         | 3           |
|                    | GO:0003674 | transporter activity                               | 1           |
|                    | GO:0003674 | binding                                            | 19          |
|                    | GO:0003674 | antioxidant activity                               | 1           |
|                    | GO:0003674 | molecular transducer activity                      | 3           |
| Cellular Component | GO:0005575 | cell                                               | 12          |
|                    | GO:0005575 | membrane                                           | 3           |
|                    | GO:0005575 | macromolecular complex                             | 1           |
|                    | GO:0005575 | organelle                                          | 10          |
|                    | GO:0005575 | organelle part                                     | 1           |
|                    | GO:0005575 | membrane part                                      | 3           |
|                    | GO:0005575 | cell part                                          | 12          |
| Biological Process | GO:0008150 | immune system process                              | 1           |
|                    | GO:0008150 | metabolic process                                  | 20          |
|                    | GO:0008150 | cellular process                                   | 18          |
|                    | GO:0008150 | signaling                                          | 4           |
|                    | GO:0008150 | multicellular organismal process                   | 3           |
|                    | GO:0008150 | developmental process                              | 1           |
|                    | GO:0008150 | single-organism process                            | 12          |
|                    | GO:0008150 | positive regulation of biological process          | 2           |
|                    | GO:0008150 | regulation of biological process                   | 16          |
|                    | GO:0008150 | response to stimulus                               | 6           |
|                    | GO:0008150 | localization                                       | 2           |
|                    | GO:0008150 | biological regulation                              | 16          |

**Supplement Table S3.** List of 20 most annotated pathways to 60 significantly differentially expressed genes identified in this study enriched in KEGG analysis

| KEGG_class                           | Pathway ID | Pathway                                             | Qvalue     | Genes                                                                                                                                                                                                                          |
|--------------------------------------|------------|-----------------------------------------------------|------------|--------------------------------------------------------------------------------------------------------------------------------------------------------------------------------------------------------------------------------|
| Organismal Systems                   | ko04710    | Circadian rhythm                                    | 0.08356132 | BP_GLEAN_10005816(BHLHE40);<br>BP_GLEAN_10007289(Nr1d2); BP_GLEAN_10016005(Bhlhe40)                                                                                                                                            |
|                                      | ko04979    | Cholesterol metabolism                              | 0.08356132 | BP_GLEAN_10013248(LPL); BP_GLEAN_10015689(SOAT1);<br>MSTRG.704(LPL)                                                                                                                                                            |
|                                      | ko04923    | Regulation of lipolysis in adipocytes               | 0.09963828 | BP_GLEAN_10011841(Irs2); BP_GLEAN_10014277(Pnpla2);<br>MSTRG.9053(adrb2)                                                                                                                                                       |
|                                      | ko04211    | Longevity regulating pathway                        | 0.12818207 | BP_GLEAN_10006563(foxo1a); BP_GLEAN_10011841(Irs2);<br>BP_GLEAN_10016747(EIF4E)                                                                                                                                                |
|                                      | ko04380    | Osteoclast differentiation                          | 0.14964106 | BP_GLEAN_10000555(Sqstm1); BP_GLEAN_10005601(RELB);<br>BP_GLEAN_10011616(junb)                                                                                                                                                 |
|                                      | ko04910    | Insulin signaling pathway                           | 0.24911012 | BP_GLEAN_10006563(foxo1a); BP_GLEAN_10011841(Irs2);<br>BP_GLEAN_10016747(EIF4E)                                                                                                                                                |
|                                      | ko04213    | Longevity regulating pathway - multiple species     | 0.25238026 | BP_GLEAN_10006563(foxo1a); BP_GLEAN_10011841(Irs2)                                                                                                                                                                             |
|                                      | ko03320    | PPAR signaling pathway                              | 0.26763459 | BP_GLEAN_10013248(LPL); MSTRG.704(LPL)                                                                                                                                                                                         |
| Metabolism                           | ko00100    | Steroid biosynthesis                                | 0.08356132 | BP_GLEAN_10007279(CYP27B1); BP_GLEAN_10015689(SOAT1)                                                                                                                                                                           |
|                                      | ko00561    | Glycerolipid metabolism                             | 0.08894408 | BP_GLEAN_10013248(LPL); BP_GLEAN_10014277(Pnpla2);<br>MSTRG.704(LPL)                                                                                                                                                           |
|                                      | ko00400    | Phenylalanine, tyrosine and tryptophan biosynthesis | 0.24911012 | BP_GLEAN_10009421(Tat)                                                                                                                                                                                                         |
| Cellular Processes                   | ko04140    | Autophagy - animal                                  | 0.0900366  | BP_GLEAN_10006362(Ulk2); BP_GLEAN_10008121(ZFYVE1);<br>BP_GLEAN_10011841(Irs2); BP_GLEAN_10014551(ddit4)<br>BP_GLEAN_10000233(diablo); BP_GLEAN_10002830(diablo);<br>BP_GLEAN_10006143(Tnfsf10);<br>BP_GLEAN_10011108(GADD45G) |
|                                      | ko04210    | Apoptosis                                           | 0.12818207 | BP_GLEAN_10000555(Sqstm1); BP_GLEAN_10005396(myc);<br>BP_GLEAN_10006563(foxo1a);<br>BP_GLEAN_10011108(GADD45G)                                                                                                                 |
|                                      | ko04218    | Cellular senescence                                 | 0.12818207 | BP_GLEAN_10000555(Sqstm1); BP_GLEAN_10005396(myc);<br>BP_GLEAN_10006563(foxo1a);<br>BP_GLEAN_10011108(GADD45G)                                                                                                                 |
|                                      | ko04215    | Apoptosis - multiple species                        | 0.14083624 | BP_GLEAN_10000233(diablo); BP_GLEAN_10002830(diablo)                                                                                                                                                                           |
| Environmental Information Processing | ko04068    | FoxO signaling pathway                              | 0.09963828 | BP_GLEAN_10006143(Tnfsf10); BP_GLEAN_10006563(foxo1a);<br>BP_GLEAN_10011108(GADD45G); BP_GLEAN_10011841(Irs2)                                                                                                                  |
|                                      | ko04150    | mTOR signaling pathway                              | 0.24911012 | BP_GLEAN_10006362(Ulk2); BP_GLEAN_10014551(ddit4);<br>BP_GLEAN_10016747(EIF4E)                                                                                                                                                 |
| Human Diseases                       | ko05216    | Thyroid cancer                                      | 0.14083624 | BP_GLEAN_10005396(myc); BP_GLEAN_10011108(GADD45G)                                                                                                                                                                             |
|                                      | ko04931    | Insulin resistance                                  | 0.16876643 | BP_GLEAN_10006563(foxo1a); BP_GLEAN_10011841(Irs2);<br>BP_GLEAN_10015535(Trib1)                                                                                                                                                |
|                                      | ko05213    | Endometrial cancer                                  | 0.24911012 | BP_GLEAN_10005396(myc); BP_GLEAN_10011108(GADD45G)                                                                                                                                                                             |
